RESEARCH ARTICLE

# Alkaline water improves exercise-induced metabolic acidosis and enhances anaerobic exercise performance in combat sport athletes

Jakub Chycki<sup>1\*</sup>, Anna Kurylas<sup>1</sup>, Adam Maszczyk<sup>2</sup>, Artur Golas<sup>1</sup>, Adam Zajac<sup>1</sup>

**1** Department of Sports Training, the Jerzy Kukuczka Academy of Physical Education in Katowice, Katowice, Poland, **2** Department of Methodology and Statistics, The Jerzy Kukuczka Academy of Physical Education in Katowice, Katowice, Poland

\* [j.chycki@awf.katowice.pl](mailto:j.chycki@awf.katowice.pl)

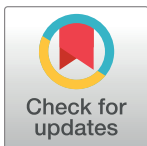

**OPEN ACCESS**

**Citation:** Chycki J, Kurylas A, Maszczyk A, Golas A, Zajac A (2018) Alkaline water improves exercise-induced metabolic acidosis and enhances anaerobic exercise performance in combat sport athletes. PLoS ONE 13(11): e0205708. <https://doi.org/10.1371/journal.pone.0205708>

**Editor:** Michal Toborek, University of Kentucky Medical Center, UNITED STATES

**Received:** July 4, 2018

**Accepted:** September 28, 2018

**Published:** November 19, 2018

**Copyright:** © 2018 Chycki et al. This is an open access article distributed under the terms of the [Creative Commons Attribution License](https://creativecommons.org/licenses/by/4.0/), which permits unrestricted use, distribution, and reproduction in any medium, provided the original author and source are credited.

**Data Availability Statement:** All relevant data are within the paper and its Supporting Information files.

**Funding:** This work was supported by the Ministry of Science and Higher Education of Poland under Grant NRSA3 03953 and NRSA4 040 54.

**Competing interests:** The authors have declared that no competing interests exist.

## Abstract

Hydration is one of the most significant issues for combat sports as athletes often use water restriction for quick weight loss before competition. It appears that alkaline water can be an effective alternative to sodium bicarbonate in preventing the effects of exercise-induced metabolic acidosis. Therefore, the main aim of the present study was to investigate, in a double blind, placebo controlled randomized study, the impact of mineral-based highly alkaline water on acid-base balance, hydration status, and anaerobic capacity. Sixteen well trained combat sport athletes (n = 16), were randomly divided into two groups; the experimental group (EG; n = 8), which ingested highly alkaline water for three weeks, and the control group (CG; n = 8), which received regular table water. Anaerobic performance was evaluated by two double 30 s Wingate tests for lower and upper limbs, respectively, with a passive rest interval of 3 minutes between the bouts of exercise. Fingertip capillary blood samples for the assessment of lactate concentration were drawn at rest and during the 3<sup>rd</sup> min of recovery. In addition, acid-base equilibrium and electrolyte status were evaluated. Urine samples were evaluated for specific gravity and pH. The results indicate that drinking alkalized water enhances hydration, improves acid-base balance and anaerobic exercise performance.

## Introduction

Despite numerous scientific data, there is still no conclusive answer regarding what and how much we should drink to optimize sports performance. Until the middle of the 20<sup>th</sup> century, the recommendation was to avoid drinking to optimize performance. The first drinking guidelines were introduced by the ACSM to avoid heat stress in 1975, while hydration and performance were first addressed only in 1996 [1]. At that time, athletes were encouraged to drink the maximum amount of fluids during exercise that could be tolerated without gastrointestinal discomfort and up to the rate lost through sweating. Depending on the type of exercise and the

environment, volumes from 0.6 to 1.2 L per hour were recommended. These drinking guidelines have been questioned recently, and other issues such as over hydration and hyponatremia have been addressed [2].

The inconsistency of the results regarding hydration and sports performance arise from differences in experimental protocols. In studies in which dehydration develops during exercise, fluid loss of up to 4% body mass does not compromise performance, while in studies that induced dehydration prior to exercise, performance impairments have been observed after dehydration as low as 1–2% body mass [3]. Several comprehensive reviews on the influence of dehydration on muscle endurance, strength, anaerobic capacity, jumping performance and skill performance in team sport games have revealed negative effects of dehydration  $\geq 2\%$  body mass [4, 5, 6]. Hydration is one of the most significant issues for combat sports, as athletes often use water restriction for quick weight loss before competition. During tournaments lasting several hours, combat sport athletes sweat immensely and increase their core temperature affecting muscle strength, reducing motor cortex activation, peripheral stimulus as well as the speed of reaction and power output [7].

Considering the vast amounts of fluids used during exercise, water seems to be the most often form of hydration. Water comes in different forms, with specific properties depending on its mineral content. The pH of water, as well as the proportions between  $\text{SO}_4^{2-}$  and  $\text{HCO}_3^-$  determines hydration status and other therapeutic properties [7]. Drinking hydrogen rich water in human nutrition is a rather new concept, and it is recently suggested for medical purposes and hydration during exercise [8–10]. Alkaline water is being marketed as a nutritional aid for the general public for acidity-lowering, antioxidant, and antiaging properties. Some of the animal and human research has confirmed its effectiveness as an alkalizing agent in the treatment of metabolic acidosis [11, 12]. However, metabolic acidosis that occurs during high intensity exercise is a distinct form of metabolic alteration, when cells are forced to rely on anaerobic ATP turnover that leads to proton release and a decrease in blood pH that can impair performance [8, 13].

Anaerobic exercise metabolism leads to the production of lactic acid in the working muscles. Part of the produced lactic acid is released to the blood, reducing blood pH, and disturbing acid–base balance. Several studies have provided evidence that hydrogen ions are released from the muscles in excess of lactate after intense exercise [14]. Two mechanisms have been proposed to explain this phenomenon. It seems that hydrogen ions are released both by a sodium-hydrogen ion exchanger and by a lactic acid transporter [15]. Since red blood cells have a higher buffering capacity than blood plasma, the lactate generated during exercise largely remains in the plasma while hydrogen ions are transferred to the red blood cells and buffered by hemoglobin [16]. One of the objectives of training and supplementation in high intensity anaerobic sports disciplines is to increase the buffering capacity of the blood and tissues [17]. The use of sodium bicarbonate has proven effective in speed endurance and strength endurance sports, yet its use has been limited due to the possibility of gastrointestinal distress, metabolic alkalosis, and even edema due to sodium overload [8, 18]. It appears that alkaline water can be an effective alternative to sodium bicarbonate in preventing exercise-induced metabolic acidosis [8, 19]. Contrary to bicarbonate, alkaline water can be used on an everyday basis and has no known side effects. However, there are only few cross-sectional or longitudinal studies on the impact of alkaline water ingestion in combat sport athletes. Therefore, the main objective of the current study was to investigate in a double blind, placebo controlled randomized study, the impact of mineral-based highly alkaline water on acid-base balance, hydration status, and anaerobic capacity in experienced combat sport athletes subjected to a very intense exercise protocol.

## Materials and methods

### Subjects

Sixteen very well-trained males, who trained and competed in combat sports for at least 7.6 years, participated in the study. The athletes constituted a homogenous group in regard to age (average age of  $22.3 \pm 0.5$  years), somatic characteristics, as well as aerobic and anaerobic performance (Table 1). The subjects ( $n = 16$ ) were randomly divided into two groups, the experimental group (EG;  $n = 8$ ), which received highly alkaline water, and the control group (CG;  $n = 8$ ), which was hydrated with table water. All subjects had valid medical examinations and showed no contraindications to participate in the study. The athletes were informed verbally and in writing of the experimental protocol, the possibility to withdraw at any stage of the experiment, and gave their written consent for participation. The study was approved by the Research Ethics Committee of the Academy of Physical Education in Katowice, Poland.

### Diet and hydration protocol

Energy intake, as well as macro and micronutrient an intake of all subjects was determined by the 24 h nutrition recall 3 weeks before the study was initiated. The participants were placed on an isocaloric ( $3455 \pm 436$  kcal/d) mixed diet (55% carbohydrates, 20% protein, 25% fat) prior and during the investigation. The pre-trial meals were standardized for energy intake (600 kcal) and consisted of carbohydrate (70%), fat (20%) and protein (10%). During the experiment, and 3 weeks before the commencement of the study, the participants did not take any medications or supplements. Throughout the experiment water intake was individualized based on the recommendation of the National Athletic Trainers Association and averaged 2.6–3.2 L per day. In our study we used water which had a pH of 9.13 which is highly alkaline compared to other commercially available products. The water ingested during the experiment contained  $840 \text{ mg/dm}^3$  of permanent ingredients, and was classified as medium mineral content. The bicarbonate ion  $\text{HCO}_3^-$  ( $357.8 \text{ mg/dm}^3$ ) and carbonate ion  $\text{CO}_3^{2-}$  ( $163.5 \text{ mg/dm}^3$ ) consisted the dominant anions. Sodium ( $\text{Na}^+$   $254.55 \text{ mg/dm}^3$ ) dominated among cations. The water contained bicarbonate, carbonate-sodium ( $\text{HCO}_3^-, \text{CO}_3^-, \text{Na}^+$ ). The chemical properties of both types of water used in the experiment (alkaline and table water) are presented in Table 2.

### Study protocol

The experiment lasted 3 weeks, during which two series of laboratory analyses were performed. The tests were carried out at baseline and after three weeks of hydration with alkaline

Table 1. Characteristics of the study participants.

| Variables                             | Experimental Group<br>(n = 8) | Control Group<br>(n = 8) |
|---------------------------------------|-------------------------------|--------------------------|
| Age (yrs.)                            | 22.7±3.2                      | 22.4 ± 2.8               |
| Height (cm)                           | 181.2±2.1                     | 178.3±4.9                |
| Body mass (kg)                        | 81.8±3.2                      | 79.2 ±2.6                |
| FM (%)                                | 10.2±2.1                      | 10.8±2.4                 |
| $W_{t\text{--upper limbs}}$ (J/kg)    | 138±14                        | 136±19                   |
| $W_{t\text{--lower limbs}}$ (J/kg)    | 276±04                        | 283±26                   |
| $P_{\text{max--lower limbs}}$ (W/kg)  | 19.8±0.9                      | 20.2±1.6                 |
| $P_{\text{max--upper limbs}}$ (W/kg)  | 8.9±1.1                       | 8.7±0.4                  |
| $\text{VO}_{2\text{max}}$ (ml/kg/min) | 64.7±2.8                      | 62.6±3.2                 |

<https://doi.org/10.1371/journal.pone.0205708.t001>

Table 2. Chemical properties of water used in the study.

| Variable                      | Measurement Unit   | Alkaline Water | Table Water  |
|-------------------------------|--------------------|----------------|--------------|
| pH                            | pH                 | 9.13 ± 0.04    | 5.00 ± 0.08  |
| CO <sub>3</sub> <sup>2-</sup> | mg/dm <sup>3</sup> | 163.5 ± 6.3    | 14.98 ± 0.66 |
| HCO <sub>3</sub> <sup>-</sup> | mg/dm <sup>3</sup> | 357.8 ± 6.14   | 3.62 ± 0.12  |
| Cl <sup>-</sup>               | mg/dm <sup>3</sup> | 26.4 ± 2.3     | 0.41 ± 0.03  |
| SO <sub>4</sub> <sup>2-</sup> | mg/dm <sup>3</sup> | 7.81 ± 1.2     | 1.60 ± 0.09  |
| Na <sup>+</sup>               | mg/dm <sup>3</sup> | 254.55 ± 7.1   | 1.21 ± 0.05  |
| K <sup>+</sup>                | mg/dm <sup>3</sup> | 0.91 ± 0.04    | 0.30 ± 0.03  |
| Ca <sup>2+</sup>              | mg/dm <sup>3</sup> | 10.00 ± 1.6    | 1.21 ± 0.05  |
| Mg <sup>2+</sup>              | mg/dm <sup>3</sup> | 0.37 ± 0.03    | 0.40 ± 0.04  |

Note: Data shows mean values ± SD of three analysis of each type of water

<https://doi.org/10.1371/journal.pone.0205708.t002>

or table water. The study was conducted during the preparatory period of the annual training cycle, when a high volume of work dominated the daily training loads. The participants refrained from exercise for 2 days before testing to minimize the effect of fatigue.

The subjects underwent medical examinations and somatic measurements. Body composition was evaluated in the morning, between 8.00 and 8.30 am. The day before, the participants had the last meal at 20.00. They reported to the laboratory after an overnight fast, refraining from exercise for 48h. The measurements of body mass were performed on a medical scale with a precision of 0.1 Kg. Body composition was evaluated using the electrical impedance technique (Inbody 720, Biospace Co., Japan). Anaerobic performance was evaluated by a two double 30-second Wingate test protocol for lower and upper limbs respectively, with a passive rest interval of 3 minutes between the bouts of exercise. The test was preceded by a 5 min warm-up with a resistance of 100 W and cadence within 70–80 rpm for lower limbs and 40 W and 50–60 rpm for the upper limbs. Following the warm-up, the test trial started, in which the objective was to reach the highest cadence in the shortest possible time, and to maintain it throughout the test. The lower limb Wingate protocol was performed on an Excalibur Sport ergocycle with a resistance of 0.8 Nm·Kg-1 (Lode BV, Groningen, Netherland). The upper body Wingate test was carried out on a rotator with a flying start with a load of 0.45 Nm·Kg-1 (Brachumera Sport, Lode, Netherland). Each subject completed 4 test trials with incomplete rest intervals. The variables of peak power–P<sub>max</sub> (W/Kg) and total work performed–W<sub>t</sub> (J/Kg), were registered and calculated by the Lode Ergometer Manager (LEM, software package, Netherland).

### Biochemical assays

To determine lactate concentration (LA), acid-base equilibrium and electrolyte status the following variables were evaluated: LA (mmol/L), blood pH, pCO<sub>2</sub> (mmHg), pO<sub>2</sub> (mmHg), HCO<sub>3-act</sub> (mmol/L), HCO<sub>3-std</sub> (mmol/L), BE (mmol/L), O<sub>2SAT</sub> (mmol/L), ctCO<sub>2</sub> (mmol/L), Na<sup>+</sup> (mmol/L), and K<sup>+</sup> (mmol/L). The measurements were performed on fingertip capillary blood samples at rest and after 3 minutes of recovery. Determination of LA was based on an enzymatic method (Biosen C-line Clinic, EKF-diagnostic GmbH, Barleben, Germany). The remaining variables were measured using a Blood Gas Analyzer GEM 3500 (GEM Premier 3500, Germany).

Urine samples were taken at rest, after an overnight fast, at baseline and at the conclusion of the investigation. They were placed in a plastic container and mixed with 5 ml/L of 5% solution of isopropyl alcohol and thymol for preservation. Urine samples were assayed for the

presence of blood and proteins. Specific gravity was determined using the Atago Digital refractometer (Atago Digital, USA). Urine pH was determined based on the standardized Mettler Toledo potentiometer (Mettler Toledo, Germany).

### Statistical analysis

The Shapiro-Wilk, Levene and Mauchly’s tests were used to verify the normality, homogeneity and sphericity of the sample’s data variances, respectively. Verifications of the differences between analyzed variables before and after water supplementation and between the EG and CG were performed using ANOVA with repeated measures. Effect sizes (Cohen’s d) were reported where appropriate. Parametric effect sizes were defined as large for  $d > 0.8$ , as moderate between 0.8 and 0.5, and as small for  $< 0.5$  (Cohen 1988; Maszczyk et al., 2014, 2016). Statistical significance was set at  $p < 0.05$ . All statistical analyses were performed using Statistica 9.1 and Microsoft Office, and were presented as means with standard deviations.

### Results

All participants completed the described testing protocol. All procedures were carried out in identical environmental conditions with an air temperature of 19.2°C and humidity of 58% (Carl Roth hydrometer, Germany).

The repeated measures ANOVA between the experimental and control group and between the baseline and post-intervention period (3 weeks of alkaline and table water ingestion) revealed statistically significant differences for thirteen variables (Table 3).

Post-hoc tests revealed a statistically significant increase in mean power when comparing the values (7.98 J/kg to 9.38 J/kg with  $p = 0.001$ ) at baseline vs. at the conclusion of the study in the experimental group supplemented with alkaline water. In contrast, the control group which received table water did not reveal any statistically significant results. Similar changes were observed for Upper Limb Average Power (from 4.32 J/kg to 5.11 J/kg with  $p = 0.011$ ) and Upper Limb Peak Power (from 7.90 J/kg to 8.91 J/kg with  $p = 0.025$ ) in the experimental group. The post-hoc tests also showed statistically significant increases in values for Lower

**Table 3. Statistically significant differences between the experimental and control groups at baseline and after 3 weeks of intervention (alkaline vs table water).**

| Variables                                         | d     | p     | F       |
|---------------------------------------------------|-------|-------|---------|
| Wingate Lower Limbs Average Power Exp.            | 0.884 | 0.001 | 21.161  |
| Wingate Upper Limbs Average Power Exp.            | 0.587 | 0.011 | 8.528   |
| Wingate UL Peak Power Exp.                        | 0.501 | 0.026 | 6.228   |
| Wingate LL Total Work Exp.                        | 0.567 | 0.045 | 4.822   |
| Wingate UL Total Work Exp.                        | 0.522 | 0.011 | 8.459   |
| LA <sub>rest</sub>                                | 0.534 | 0.008 | 9.429   |
| LA <sub>post exr</sub>                            | 0.618 | 0.003 | 13.382  |
| pH <sub>rest</sub>                                | 0.834 | 0.001 | 120.159 |
| HCO <sub>3</sub> <sup>-</sup> <sub>rest</sub>     | 0.844 | 0.001 | 109.250 |
| HCO <sub>3</sub> <sup>-</sup> <sub>post exr</sub> | 0.632 | 0.002 | 14.724  |
| K <sup>+</sup> <sub>post exr</sub>                | 0.501 | 0.040 | 5.154   |
| Urine pH                                          | 0.589 | 0.017 | 7.298   |
| SG                                                | 0.884 | 0.001 | 19.707  |

Note: d—effect size; p—statistical significance  
F—value of analysis of variance function

<https://doi.org/10.1371/journal.pone.0205708.t003>

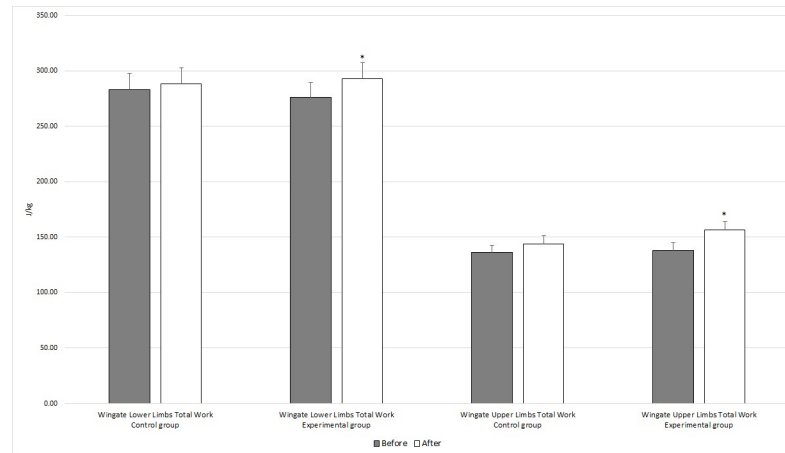

**Fig 1. Differences between the control and experimental groups in total work of the lower and upper limbs (30s Wingate test) at baseline and after 3 weeks of alkaline or table water ingestion.** Note: \* statistically significant values.

<https://doi.org/10.1371/journal.pone.0205708.g001>

Limb Total Work (from 276.04 J/kg to 292.96 J/kg with  $p = 0.012$ ) and Upper Limb Total Work (from 138.15 J/kg to 156.37 J/kg with  $p = 0.012$ ) when baseline and post intervention values were compared. The changes in the control group were not statistically significant. These results are presented in Fig 1.

Post-hoc tests also revealed statistically significant decreases in LA concentration at rest (from 1.99 mmol/L to 1.30 mmol/L with  $p = 0.008$ ), and a significant increase in post exercise LA concentration (from 19.09 mmol/L to 21.20 mmol/L with  $p = 0.003$ ) in the experimental group ingesting alkaline water.

Additionally, a significant increase in blood pH at rest (from 7.36 to 7.44 with  $p = 0.001$ ),  $\text{HCO}_3^-$  at rest (from 23.87 to 26.76 with  $p = 0.001$ ), and  $\text{HCO}_3^-$  post exercise (from 12.90 to 13.88 with  $p = 0.002$ ) were observed in the experimental group. The other significant changes occurred in the post exercise concentration of  $\text{K}^+$  (from 4.15 to 4.41 with  $p = 0.039$ ), in urine pH (from 5.75 to 6.62 with  $p = 0.017$ ), and a decrease in the value of SG (from 1.02 to 1.00 with  $p = 0.001$ ), all in the experimental group supplemented with alkaline water.

## Discussion

Acid-base equilibrium within the human body is tightly maintained through the blood and tissue buffering systems, the diffusion of carbon dioxide from the blood to the lungs via respiration, and the excretion of hydrogen ions from the blood to urine by the kidneys. These mechanisms also regulate acid-base balance following high intensity exercise. Metabolic acidosis is a consequence of exercise induced ionic changes in contracting muscles. Increased intramuscular acidity impairs muscle contractibility, significantly limiting high intensity exercise performance [20]. Importantly, acid-base equilibrium can be influenced by dietary supplementation.

In the present study, we investigated the effect of mineral-based alkaline water on acid-base balance, hydration status and anaerobic performance of competitive combat sport athletes. The study participants were experienced athletes (Table 1), capable of performing extreme anaerobic efforts. We have chosen such an approach for two reasons. First, it is well-documented that consumption of alkalizing water can have a significant effect on the hydration status, acid-base balance, urine and blood pH [8, 10], as well as Ca metabolism and bone



resorption markers [21]. However, the majority of these research reports have been performed on sedentary individuals [22] or on subjects with self-reported physical activity [10]. Second, alkalization by alkaline water has been mostly discussed in the context of dehydration and aerobic performance [10]. Therefore, our study is novel by including both well trained combat sport athletes and the use of an extremely intensive anaerobic exercise protocol.

### Acid-base balance and hydration status

The exchange of ions, CO<sub>2</sub>, and water between the intracellular and extracellular compartments helps to restore acid-base balance following intensive exercise. There is sufficient data indicating that, supplements that modify the blood buffering system affect high-intensity exercise performance [23]. In humans, especially well trained athletes muscle pH may decrease from 7.0 at rest to values as low as 6.4–6.5 during exercise [24]. Ergogenic aids that help buffer protons attenuate changes in pH and enhance the muscle's buffering capacity. This in turn allows for a greater amount of lactate to accumulate in the muscle during exercise.

The results of our study are in line with the available literature regarding the impact of alkaline water on blood and urine pH at rest [9, 19, 25]. However, novel results of the present research are related to the changes in HCO<sub>3</sub><sup>-</sup> after exercise in athletes ingesting alkaline water. Bicarbonate-CO<sub>2</sub> accounts for more than 90% of the plasma buffering capacity. Supplementation can increase bicarbonate concentration in the blood and its pH. Since bicarbonate concentration is much lower in the muscles (10 mmol/L) than in the blood (25 mmol/L), the low permeability of charged bicarbonate ions precludes any immediate effects on muscle acid-base status [24]. These results confirm the view that an appropriate hydration status is necessary for active bicarbonate ion transport.

Several lines of evidence support the negative impact of dehydration (>2% body mass) on muscle endurance, strength, and anaerobic performance [6]. On the other hand, literature data indicates that consumption of alkaline water following a dehydrating bout of cycling exercise was shown to rehydrate cyclists faster and more completely compared to table water. Following consumption of alkaline water, the cyclists demonstrated lower total urine output, their urine was more concentrated (i.e., with higher specific gravity), and the total blood protein concentration was lower, indicating improved hydration status [26]. Our previous study revealed that the use of water with alkalizing properties exhibits a significant potential for hydration during anaerobic exercise [9]. The results of the present study confirm a decrease in urine specific gravity (from 1.02 to 1.00, with  $p = 0.001$ ) and an increase in urine pH as the result of consumption of alkaline water. These results illustrate that the habitual consumption of highly alkaline water can markedly improve hydration status.

### Anaerobic performance

The current investigation demonstrated a significant increase in anaerobic capacity ( $W_t$ -J/Kg) of athletes in the experimental group supplemented with alkaline water. The improvements in  $W_t$  following alkaline water consumption were influenced by positive changes in blood pH and bicarbonate. This phenomenon could be explained by the ergogenic effects of high alkalization and mineral ingredients.

High intensity exercise in which anaerobic glycolysis provides ATP for muscle contraction leads to an equal production of lactate and hydrogen ions. Most of the released hydrogen ions are buffered; however, a small portion (~0.001%) that remains in the cytosol causes a decrease in muscle pH and an impairment of exercise. Lactate efflux [15] and its oxidation are accompanied by a similar removal of hydrogen ions. The results of the current study demonstrated a statistically significant decrease in lactate concentration at rest (from 1.99 mmol/L to 1.30

mmol/L,  $p = 0.008$ ), and a significant increase post exercise (from 19.09 mmol/L to 21.20 mmol/L,  $p = 0.003$ ) when compared to the baseline levels with the values recorded at the end of alkaline water supplementation. The extremely intense 4 x 30s upper/lower limb Wingate test protocol employed in our study, with only short rest intervals between each bout of exercise, was a likely reason that less of the total lactate produced in the muscles was transported to the blood [27].

Muscle blood flow determines lactate efflux from the muscle [28], and is dependent on the activity of lactate transport proteins [29], the extracellular buffering capacity [30], and the extracellular lactate concentration [28]. Thus, our results on lactate concentration are in agreement with the view that anaerobic performance (i.e.,  $W_{t-J}/\text{Kg}$ ,  $W_{\text{Avr-J}}/\text{Kg}$ ) depends on counter-regulatory variables. Indeed, we demonstrated that changes in resting blood pH and  $\text{HCO}_3^-$  significantly improved anaerobic performance. Another variable that can affect anaerobic performance includes blood viscosity. Weidmann et al. (2016) showed that the intake of highly alkaline water decreased blood viscosity by 6.30%, compared to table water (3.36%) in 100 recreationally active female and male subjects. Therefore, it may be possible that the excess of metabolic end-products (namely,  $\text{H}^+$  and Pi), which disturb cellular homeostasis and muscle contraction, are more effectively transported. The available literature data does not specify clearly which components of buffering capacity are altered by the above changes. It must be indicated, that there are several methods available to determine muscle buffering capacity. Due to the methodological complexity, none of these methods are free from criticism. In most studies buffering capacity has been determined in vitro by titration, which does not include trans-membrane transport of acid-base substances or dynamic buffering by biochemical processes occurring in vivo [31].

Most studies show a documented ergogenic effect of bicarbonate loading during exhaustive exercise lasting 1–7 min, when anaerobic glycolysis plays a major role in energy provision [32]. The rationale for the ergogenic effect of bicarbonate is that the increase in extracellular pH and bicarbonate will enhance the efflux of lactate and  $\text{H}^+$  from muscle. There is also evidence that the ergogenic effect of bicarbonate is more pronounced during repeated sprints than during sustained exercise [30].

Different strategies used for improving buffering capacity of tissues and blood do not allow for a direct comparison. Despite this, there appears to exist an ergogenic effect in response to  $\text{NaHCO}_3^-$ , what may explain the large effect size noted by Tobias et al. [33]. In our research we obtained large effect sizes with regards to 4 variables (Average power of the lower limbs, resting  $\text{HCO}_3^-$ , resting blood pH and urine SG).

## Conclusions

The results of the present study indicate that drinking alkalized water improves hydration status, acid-base balance, and high intensity anaerobic exercise performance. It appears that both greater muscle buffering capacity and enhanced removal of protons, resulting in increased glycolytic ATP production, may be responsible for these effects. Considering the energy demands and the intense sweat rate of combat sport athletes, the authors recommend the daily intake of 3–4 L of highly alkaline mineralized water to improve hydration and anaerobic performance during training and competition.

## Supporting information

**S1 Table. Data for Fig 1.**

(XLSX)



**S2 Table. Stress test data.**

(XLSX)

**S3 Table. Water data.**

(XLSX)

**Acknowledgments**

This work was supported by the Ministry of Science and Higher Education of Poland under Grant NRSA3 03953 and NRSA4 040 54.

**Author Contributions**

**Conceptualization:** Jakub Chycki, Adam Zajac.

**Data curation:** Anna Kurylas, Adam Maszczyk, Artur Golas.

**Formal analysis:** Artur Golas.

**Investigation:** Jakub Chycki, Adam Zajac.

**Methodology:** Jakub Chycki, Anna Kurylas, Adam Zajac.

**Project administration:** Anna Kurylas.

**Validation:** Adam Maszczyk.

**Visualization:** Adam Maszczyk.

**Writing – original draft:** Jakub Chycki, Adam Zajac.

**References**

1. Convertino VA, Armstrong LE, Coyle EF, Mack GW, Sawka MN, Senay LC, Sherman WM. American college of sports medicine position stand. Exercise and fluid replacement. *Med Sci Sports Exerc* 1996; 28.
2. Noakes TD, Speedy DB. Case proven. Exercise associated hyponatraemia is due to overdrinking. So why did it take 20 years before the original evidence was accepted? *Brit J Sports Med* 2006; 40:567–572.
3. Mettler S, Mannhart CH. Hydration, drinking and exercise performance. *Swiss Sports Ex Med* 2017; 65 (1), 16–21.
4. Davis JK, Laurent CM, Allen KE, Green IM, Stolworthy NI, Welch TR, Nevett ME. Influence of dehydration on intermittent sprint performance. *J. Strength Cond Res* 2015; 29:2586–93. <https://doi.org/10.1519/JSC.0000000000000907> PMID: 25774626
5. Judelson DA, Maresh CM, Anderson IM, Armstrong LE, Casa DI, Kraemer WJ, Volek JS. Hydration and muscular performance: Does fluid balance affect strength, power and high-intensity endurance. *Sports Med* 2007; 37:907–921. <https://doi.org/10.2165/00007256-200737100-00006> PMID: 17887814
6. Savoie FA, Kenefick RW, Ely BR, Chevront SN, Goulet ED. Effect of hypohydration on muscle endurance, strength, anaerobic power and capacity and vertical jumping ability. A meta-analysis. *Sports Med* 2015; 45:1207–27. <https://doi.org/10.1007/s40279-015-0349-0> PMID: 26178327
7. Kurylas A, Zajac T, Zydek G, Zajac A. The Effectiveness of Alkaline Water in Hydrating Athletes. *J Nutrition Health Food Sci* 2017; 5(1): 1–4.
8. Ostojic SM, Stojanovic MD. Hydrogen-rich water affected blood alkalinity in physically active men. *Res Sport Med* 2014; 22:1,49–60.
9. Chycki J, Zajac T, Maszczyk A, Kurylas A. The effect of mineral-based alkaline water on hydration status & the metabolic response to short-Term anaerobic exercise. *Biol Sport* 2017; 34(3).
10. Heil PD. Acid-base balance and hydration status following consumption of mineral-based alkaline bottled water. *J Int Soc Sports Nutr* 2010; 7:29. <https://doi.org/10.1186/1550-2783-7-29> PMID: 20836884

11. Fang Y, Fu XJ, Gu C, Xu P, Wang Y, Yu WR, Sun Q, Sun XJ, Yao M. Hydrogen-rich saline protects against acute lung injury induced by extensive burn in rat model. *Journal of Burn Care and Research* 2011; 32, e82–91. <https://doi.org/10.1097/BCR.0b013e318217f84f> PMID: 21436720
12. Watanabe T, Pan I, Fukuda Y, Murasugi E, Kamata H, Uwatoko K. Influences of alkaline ionized water on milk yield, body weight of offspring and perinatal dam in rats. *Journal of Toxicological Sciences* 1998; 23, 365–371. PMID: 9922938
13. Robergs RA, Ghiasvand F, Parker D. Biochemistry of exercise-induced metabolic acidosis. *American Journal of Physiology, Regulatory, Integrative and Comparative Physiology* 2004; 287, R502–516. <https://doi.org/10.1152/ajpregu.00114.2004> PMID: 15308499
14. Bangsbo J, Johansen L, Graham T, Saltin B. Lactate and H<sup>+</sup> effluxes from human skeletal muscles during intense dynamic exercise. *Journal of Physiology* 1993; 422, 539–559.
15. Juel C. Lactate-proton cotransport in skeletal muscle. *Physiol Rev* 1997; 77:321–58. <https://doi.org/10.1152/physrev.1997.77.2.321> PMID: 9114817
16. Medbo JI, Hanem S, Noddeland H, Jebens E. Arterio-venous differences of blood acid-base status and plasma sodium caused by intense bicycling. *Acta Physiol Scand* 2000; 168, 311–326. <https://doi.org/10.1046/j.1365-201x.2000.00650.x> PMID: 10712569
17. Putman CT, Jones NL, Heigenhauser GJF. Effects of short-term training on plasma acid-base balance during incremental exercise in man. *J Physiol* 2003; 550, 585–603. <https://doi.org/10.1113/jphysiol.2003.039743> PMID: 12766247
18. McNaughton LR, Siegler J, Midgley A. Ergogenic effects of sodium bicarbonate. *Curr Sports Med Rep* 2008; 7 (4):230:6. <https://doi.org/10.1249/JSR.0b013e31817ef530> PMID: 18607226
19. Kurylas A, Zajac T, Chycki J, Maszczyk A, Zajac A. Anaerobic Performance and Acid-Base Balance in Basketball Players after the Consumption of Highly Alkaline Water. *Int J Food and Nutr Sci* 2018; 5 (1):134–9.
20. Gledhill N. Bicarbonate ingestion and anaerobic performance. *Sports Med* 1984; 1: 177–80. <https://doi.org/10.2165/00007256-198401030-00001> PMID: 6390600
21. Wynn E, Raetz E, Burckhardt P. The composition of mineral waters sourced from Europe and North America in respect to bone health: composition of mineral water optimal bone. *Br J Nut* 2009; 101:1195–1199.
22. Santaka S, Takeki H, Kiichiro T. Advanced research on the health benefit of reduced water. *Trends Food Sc and Technol*; 2012, 23,(2): 124–131.
23. Amelia J, Carr AJ, Will G, Hopkins C, Gore J. Effects of Acute Alkalosis and Acidosis on Performance. *Sport Med* 2011; 1; 41(10).
24. Sahlin K. Intracellular pH and energy metabolism in skeletal muscle, with special reference to exercise. *Acta Physiol Scand Suppl* 1978; 455:1–56. PMID: 27059
25. Weidman J, Holsworth RE, Brossman B, Cho JD, Cyr J, Fridman G. Effect of electrolyzed high-pH alkaline water on blood viscosity in healthy adults. *J Int Soc Sports Nutr* 2016; 13:45. <https://doi.org/10.1186/s12970-016-0153-8> PMID: 27932937
26. Armstrong LE, Ganio MS, Klau JF, Johnson EC, Casa DJ, Maresh CM. Novel hydration assessment techniques employing thirst and a water intake challenge in healthy men. *Appl. Physiol Nutr Metab* 2014; 39; 138–144. <https://doi.org/10.1139/apnm-2012-0369> PMID: 24476468
27. Katz A, Broberg S, Sahlin K. Muscle ammonia and amino acid metabolism during dynamic exercise in man. *Clin Physiol* 1986; 6:365–79. PMID: 3742956
28. Harris RC, Hultman E, Nordesjo LO. Glycogen, glycolytic intermediates and high-energy phosphates determined in biopsy samples of musculus quadriceps femoris of men at rest. *Methods and variance of values. Scan J Clin Lab Invest* 1974; 33:109–20.
29. Bonen A, McCullagh KJ, Putman CT. Short-term training increases human muscle MCT1 and femoral venous lactate in relation to muscle lactate. *Am J Physiol* 1998; 274:E102–7. PMID: 9458754
30. Carr AJ, Hopkins WG, Gore CJ. Effect of acute alkalosis and acidosis on performance: a meta-analysis. *Sports Med*. 2011, 41:801–14. <https://doi.org/10.2165/11591440-000000000-00000> PMID: 21923200
31. Edge J, Bishop D, Goodman C. The effects of training intensity on muscle buffer capacity in females. *Eur J Appl Physiol*, 2006, 96:97. <https://doi.org/10.1007/s00421-005-0068-6> PMID: 16283370
32. Linderman JK, Gosselink KL. The effects of sodium bicarbonate ingestion on exercise performance. *Sports Med* 1994, 18:75–80. <https://doi.org/10.2165/00007256-199418020-00001> PMID: 9132921
33. Tobias G, Benatti FB, de Salles Painelli V, Roschel H, Gualano B, Sale C, Harris RC, Lancha, AH, Artioli GG. Additive effects of beta-alanine and sodium bicarbonate on upper-body intermittent performance. *Amino Acids* 2013, 45:30917.
