# Supplementary material for: Alkaline water improves exercise-induced metabolic acidosis and enhances anaerobic exercise performance in combat sport athletes
Source: PLoS One. 2018 Nov 19;13(11):e0205708. doi: 10.1371/journal.pone.0205708 (PMC6242303; doi:10.1371/journal.pone.0205708)
Supplement: S3 Table — (XLSX) [file pone.0205708.s003.xlsx]

## Sheet: Sheet1
	Variable	Measurement Unit	Alkaline Water	Table Water
	pH	pH	9.13 ± 0.04	5.00 ± 0.08
	CO32-	mg/dm3	163.5 ± 6.3	14.98 ± 0.66
	HCO3-	mg/dm3	357.8 ± 6.14	3.62 ± 0.12
	Cl-	mg/dm3	26.4 ± 2.3	0.41 ± 0.03
	SO42-	mg/dm3	7.81± 1.2	1.60 ± 0.09
	Na+	mg/dm3	254.55 ± 7.1	1.21 ± 0.05
	K+	mg/dm3	0.91 ± 0.04	0.30 ± 0.03
	Ca2+	mg/dm3	10.00 ± 1.6	1.21 ± 0.05
	Mg2+	mg/dm3	0.37 ± 0.03	0.40 ± 0.04
